# Supplementary material for: Natural history of Becker muscular dystrophy: a multicenter study of 225 patients
Source: PubMed Central journal article supplement (PMC10723226; doi:10.1002/acn3.51925), 2023-10-26

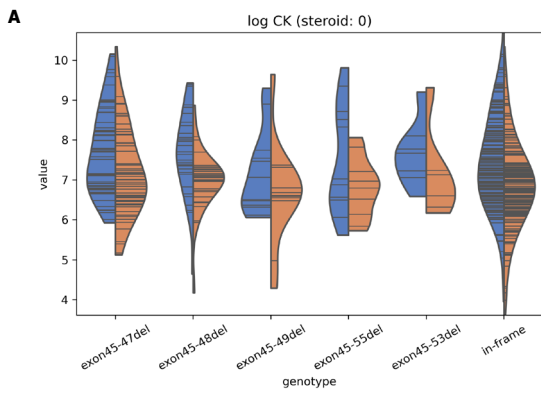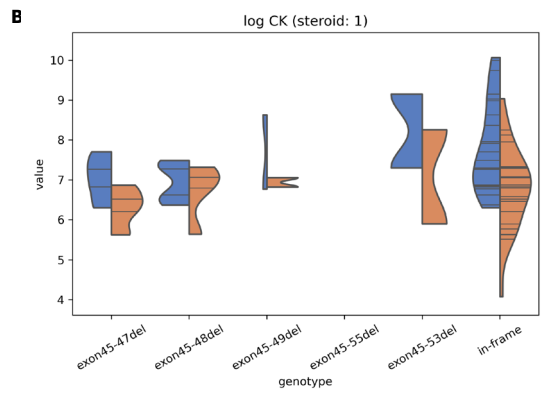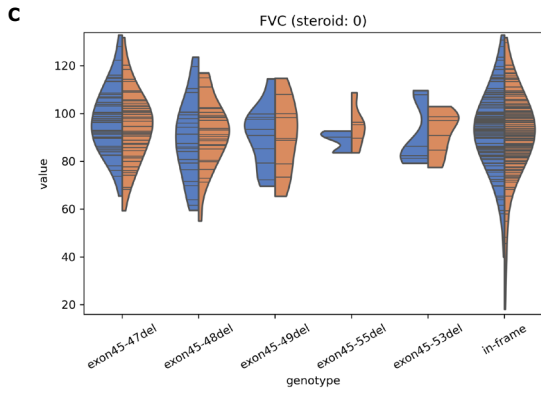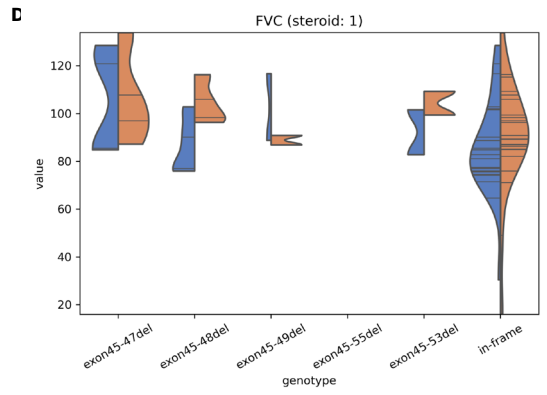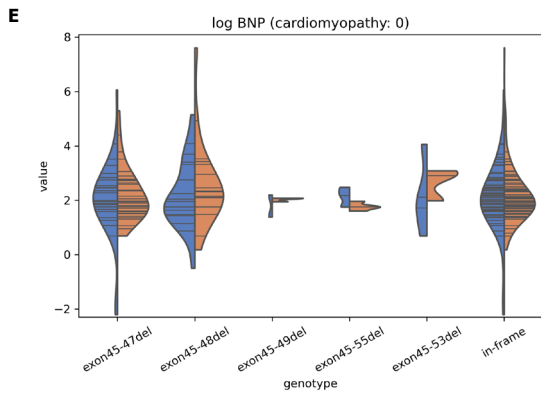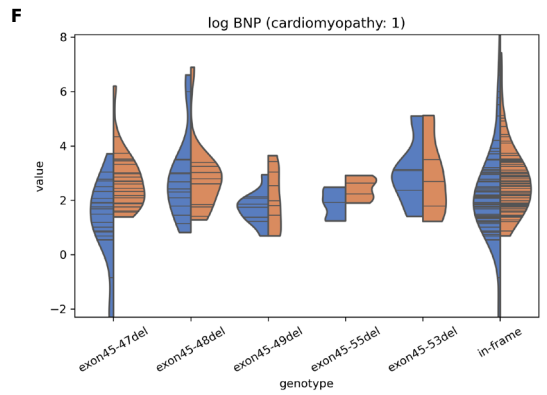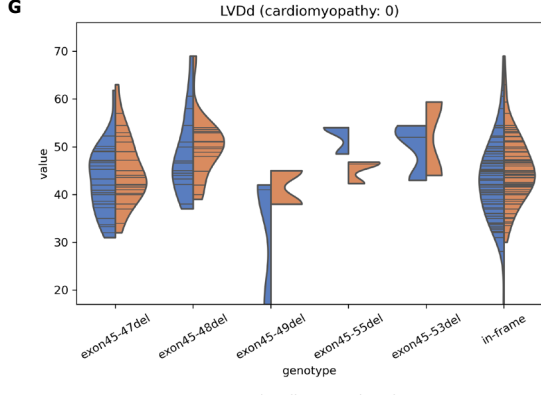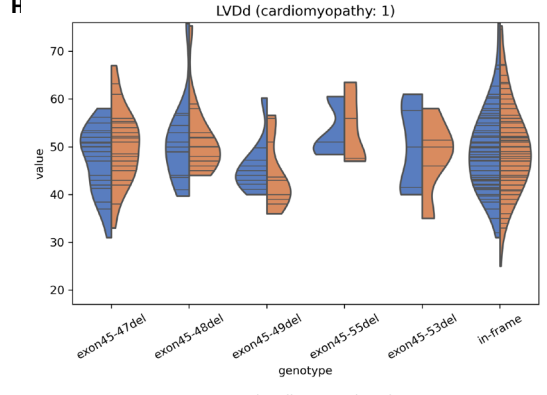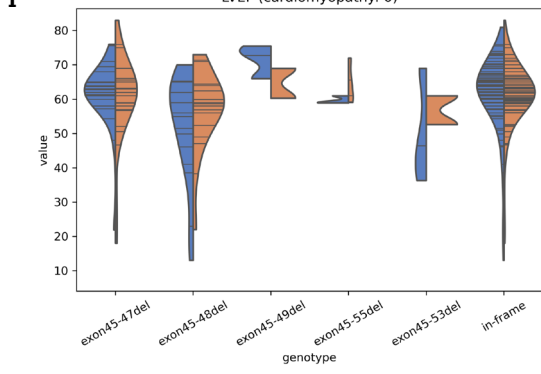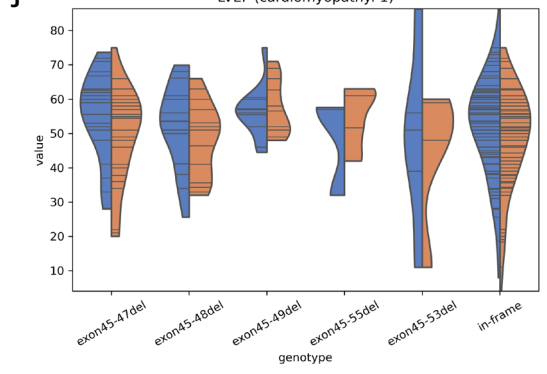

Supplement: ACN3-10-2360-s005.pdf [file ACN3-10-2360-s005.pdf]
